# Supplementary material
Source: PubMed Central journal article supplement (PMC4784541)

**Supplemental Table S1. For primary commodities, experimental data are available showing changes in nutrient concentration when grown at elevated [CO<sub>2</sub>]. Other food commodities were designated into one of four composite groups.**

| Primary Commodities                                                                                                            | Composite Groups                                          |                                                                                                    |                                                                                                                                                                                                                                                                                                                                                                                                                                                                                                                                                                                            |                                                                                                                                                          |
|--------------------------------------------------------------------------------------------------------------------------------|-----------------------------------------------------------|----------------------------------------------------------------------------------------------------|--------------------------------------------------------------------------------------------------------------------------------------------------------------------------------------------------------------------------------------------------------------------------------------------------------------------------------------------------------------------------------------------------------------------------------------------------------------------------------------------------------------------------------------------------------------------------------------------|----------------------------------------------------------------------------------------------------------------------------------------------------------|
|                                                                                                                                | C3 legumes                                                | C3 tubers                                                                                          | C3 plants                                                                                                                                                                                                                                                                                                                                                                                                                                                                                                                                                                                  | C4 grasses                                                                                                                                               |
| <b>Barley</b><br><b>Maize</b><br><b>Peas</b><br><b>Potatoes</b><br><b>Rice</b><br><b>Sorghum</b><br><b>Soy</b><br><b>Wheat</b> | <b>Beans</b><br><b>Groundnuts</b><br><b>Pulses, other</b> | <b>Cassava</b><br><b>Roots, Other</b><br><b>Sugar Beet</b><br><b>Sweet Potatoes</b><br><b>Yams</b> | <b>Apples</b><br><b>Bananas</b><br><b>Cereals, Other</b><br><b>Citrus, Other</b><br><b>Cocoa Beans</b><br><b>Coconuts - Inclu Copra</b><br><b>Coffee</b><br><b>Cottonseed</b><br><b>Dates</b><br><b>Fruits, Other</b><br><b>Grapefruit</b><br><b>Grapes</b><br><b>Lemons, limes</b><br><b>Oats</b><br><b>Olives</b><br><b>Onions</b><br><b>Oranges, Mandarins</b><br><b>Palm kernels</b><br><b>Plantains</b><br><b>Rape and Mustard seed</b><br><b>Rye</b><br><b>Sesame seed</b><br><b>Sunflower seed</b><br><b>Tea</b><br><b>Tomatoes</b><br><b>Tree Nuts</b><br><b>Vegetables, Other</b> | <b>Cereals, Other (Teff)</b><br><b>Millet</b><br><b>Sugar, Refined</b><br><b>Sugar Cane</b><br><b>Sugar, Non-Centrifugal</b><br><b>Sweeteners, Other</b> |

**Supplemental Table 2. Altered risk of zinc deficiency  $\pm$  CI under elevated [CO<sub>2</sub>] (550 p.p.m.) scenario calculated regionally, using FNB/IOM estimates for physiological zinc requirements**

| VARIABLE                                                      | High-income             | Southern and Tropical L. America | Central and Andean L. America and Carib. | Central and Eastern Europe | Central Asia, North Africa and Middle East | Sub-Saharan Africa      | South Asia              | India                   | East and Southeast Asia and Pacific | China                   | Global                  |
|---------------------------------------------------------------|-------------------------|----------------------------------|------------------------------------------|----------------------------|--------------------------------------------|-------------------------|-------------------------|-------------------------|-------------------------------------|-------------------------|-------------------------|
| Number of Countries                                           | 30                      | 5                                | 27                                       | 20                         | 28                                         | 48                      | 5                       | 1                       | 21                                  | 3                       | 188                     |
| Population (millions)                                         | 937.2                   | 249.4                            | 301.4                                    | 330.1                      | 481.4                                      | 757.8                   | 355.0                   | 1140.5                  | 606.8                               | 1337.7                  | 6497.5                  |
| Energy (kcal)                                                 | 3423.9                  | 3031.4                           | 2835.7                                   | 3285.8                     | 3089.2                                     | 2350.5                  | 2233.7                  | 2295.2                  | 2585.2                              | 2905.0                  | 2776.2                  |
| Zinc (mg/d)                                                   | 12.8 (12.7, 12.9)       | 11.9 (11.8, 12.0)                | 10.3 (10.2, 10.4)                        | 11.2 (11.1, 11.3)          | 13.1 (13.0, 13.2)                          | 8.0 (7.9, 8.1)          | 9.0 (8.9, 9.1)          | 9.3 (9.1, 9.5)          | 8.6 (8.5, 8.7)                      | 13.2 (13.0, 13.4)       | 10.9 (10.8, 11.1)       |
| Phytate (mg/d)                                                | 1162.2 (1158.8, 1165.6) | 1162.0 (1157.4, 1166.6)          | 1881.7 (1880.1, 1883.3)                  | 1183.0 (1176.1, 1189.9)    | 2702.7 (2680.3, 2725.1)                    | 1777.3 (1776.3, 1778.3) | 1981.2 (1953.4, 2009.0) | 2286.4 (2248.5, 2324.3) | 1436.0 (1434.6, 1437.4)             | 1440.0 (1427.0, 1453.0) | 1707.3 (1699.8, 1714.8) |
| Absorbable zinc (mg/d)                                        | 3.27 (3.26, 3.28)       | 3.17 (3.16, 3.18)                | 2.47 (2.45, 2.49)                        | 3.04 (3.03, 3.05)          | 2.48 (2.47, 2.49)                          | 2.10 (2.09, 2.11)       | 2.18 (2.17, 2.19)       | 2.11 (2.09, 2.13)       | 2.41 (2.40, 2.42)                   | 3.12 (3.10, 3.14)       | 2.65 (2.64, 2.66)       |
| % mean physiological requirement                              | 102.6 (102.3, 102.9)    | 106.1 (105.4, 106.8)             | 85.5 (84.6, 86.4)                        | 94.2 (93.7, 94.7)          | 85.5 (85.2, 85.8)                          | 79.4 (78.6, 80.2)       | 78.6 (78.0, 79.2)       | 73.0 (71.9, 74.1)       | 81.7 (81.0, 82.4)                   | 100.2 (99.4, 101.0)     | 88.6 (88.3, 88.9)       |
| Estimated % of pop. with inadequate zinc intake               | 47.3 (47.0, 47.6)       | 42.8 (42.1, 43.5)                | 74.6 (73.6, 75.6)                        | 59.9 (53.9, 60.5)          | 74.9 (74.5, 75.3)                          | 82.7 (81.9, 83.5)       | 85.8 (85.3, 86.3)       | 93.1 (92.4, 93.8)       | 79.4 (78.9, 79.9)                   | 49.8 (49.0, 50.6)       | 68.9 (68.7, 69.1)       |
| Absolute % increase in population with inadequate zinc intake | 2.0 (1.7, 2.3)          | 2.0 (1.3, 2.7)                   | 3.3 (2.3, 4.3)                           | 3.3 (2.7, 3.9)             | 4.3 (3.9, 4.7)                             | 3.6 (2.8, 4.4)          | 3.2 (2.7, 3.7)          | 2.6 (1.9, 3.3)          | 2.5 (2.0, 3.0)                      | 2.3 (1.5, 3.1)          | 2.8 (2.6, 3.0)          |
| Relative % increase in population with inadequate zinc intake | 4.5 (3.9, 5.1)          | 4.5 (2.9, 6.1)                   | 4.7 (3.4, 6.0)                           | 5.8 (4.7, 6.9)             | 6.2 (5.6, 6.8)                             | 4.9 (3.8, 6.0)          | 4.0 (3.4, 4.6)          | 2.9 (2.1, 3.7)          | 3.6 (2.9, 4.3)                      | 4.8 (3.0, 6.6)          | 4.4 (4.0, 4.8)          |
| Population newly at risk of inadequate zinc intake (millions) | 19.0 (16.6, 21.4)       | 4.9 (3.1, 6.7)                   | 10.0 (7.1, 12.9)                         | 10.8 (8.8, 12.8)           | 20.6 (18.8, 22.4)                          | 27.3 (21.4, 33.2)       | 11.5 (9.7, 13.3)        | 30.1 (21.6, 38.6)       | 15.4 (12.4, 15.4)                   | 30.4 (19.4, 41.4)       | 180.0 (163.8, 196.2)    |

**Supplemental Table 3. Altered risk of zinc deficiency  $\pm$  CI under elevated [CO<sub>2</sub>] (550 p.p.m.) scenario calculated regionally, with rice included in the C<sub>3</sub> plant model**

| <b>VARIABLE</b>                                                      | High-income             | Southern and Tropical L. America | Central and Andean L. America and Carib. | Central and Eastern Europe | Central Asia, North Africa and Middle East | Sub-Saharan Africa      | South Asia              | India                   | East and Southeast Asia and Pacific | China                   | Global                  |
|----------------------------------------------------------------------|-------------------------|----------------------------------|------------------------------------------|----------------------------|--------------------------------------------|-------------------------|-------------------------|-------------------------|-------------------------------------|-------------------------|-------------------------|
| <b>Number of Countries</b>                                           | 30                      | 5                                | 27                                       | 20                         | 28                                         | 48                      | 5                       | 1                       | 21                                  | 3                       | 188                     |
| <b>Population (millions)</b>                                         | 937.2                   | 249.4                            | 301.4                                    | 330.1                      | 481.4                                      | 757.8                   | 355.0                   | 1140.5                  | 606.8                               | 1337.7                  | 6497.5                  |
| <b>Energy (kcal)</b>                                                 | 3423.9                  | 3031.4                           | 2835.7                                   | 3285.8                     | 3089.2                                     | 2350.5                  | 2233.7                  | 2295.2                  | 2585.2                              | 2905.0                  | 2776.2                  |
| <b>Zinc (mg/d)</b>                                                   | 12.8 + 0.1              | 12.0 (11.9, 21.1)                | 10.4(10.3, 10.5)                         | 11.2 (11.1, 11.3)          | 13.1 (13.0, 13.2)                          | 8.0 (7.9, 8.1)          | 9.0 (8.9, 9.1)          | 9.3 (9.1, 9.5)          | 8.6 (8.5, 8.7)                      | 13.2 (13.0, 13.4)       | 10.9 (10.8, 11.0)       |
| <b>Phytate (mg/d)</b>                                                | 1162.2 (1158.8, 1165.6) | 1162.0 (1157.4, 1166.6)          | 1881.7 (1880.1, 1883.3)                  | 1183.0 (1176.1, 1189.9)    | 2702.7 (2680.3, 2725.1)                    | 1777.3 (1776.3, 1778.3) | 1981.2 (1953.4, 2009.0) | 2286.4 (2248.5, 2324.3) | 1436.0 (1434.6, 1437.4)             | 1440.0 (1427.0, 1453.0) | 1707.3 (1699.8, 1714.8) |
| <b>Absorbable zinc (mg/d)</b>                                        | 3.28 (3.275, 3.285)     | 3.17 (3.16, 3.18)                | 2.48 (2.46, 2.50)                        | 3.04 (3.03, 3.05)          | 2.48 (2.47, 2.49)                          | 2.10 (2.09, 2.11)       | 2.18 (2.17, 2.19)       | 2.11 (2.09, 2.13)       | 2.41 (2.40, 2.42)                   | 3.13 (3.12, 3.14)       | 2.65 (2.64, 2.66)       |
| <b>% mean physiological requirement</b>                              | 158.8 (158.6, 159.0)    | 162.3 (161.6, 163.0)             | 130.1 (129.3, 130.9)                     | 146.5 (146.0, 147.0)       | 129.6 (129.3, 129.9)                       | 119.0 (118.2, 119.8)    | 118.3 (117.7, 118.9)    | 110.4 (109.3, 111.5)    | 124.6 (123.9, 125.3)                | 153.4 (152.7, 154.1)    | 135.2 (134.8, 135.5)    |
| <b>Estimated % of pop. with inadequate zinc intake</b>               | 8.0 (7.9, 8.1)          | 6.9 (6.7, 7.1)                   | 18.9 (18.3, 19.5)                        | 10.5 (10.3, 10.7)          | 19.5 (19.3, 19.7)                          | 29.4 (28.5, 30.3)       | 27.2 (26.5, 27.9)       | 35.3 (34.0, 36.6)       | 24.4 (23.7, 25.1)                   | 8.4 (8.2, 8.6)          | 19.4 (19.1, 19.7)       |
| <b>Absolute % increase in population with inadequate zinc intake</b> | 0.5 (0.4, 0.6)          | 0.4 (0.3, 0.6)                   | 1.9 (1.3, 2.4)                           | 0.9 (0.8, 1.1)             | 2.4 (2.2, 2.6)                             | 3.8 (2.9, 4.7)          | 2.9 (2.2, 3.5)          | 4.1 (2.8, 5.4)          | 2.3 (1.6, 3.0)                      | 0.5 (0.4, 0.7)          | 2.0 (1.7, 2.3)          |
| <b>Relative % increase in population with inadequate zinc intake</b> | 6.2 (5.4, 7.0)          | 6.1 (3.9, 8.4)                   | 10.6 (7.4, 13.8)                         | 9.3 (7.5, 11.0)            | 13.9 (12.6, 15.2)                          | 14.4 (11.2, 17.6)       | 12.0 (9.7, 14.4)        | 13.1 (8.8, 17.3)        | 9.7 (7.2, 12.2)                     | 6.6 (4.3, 9.0)          | 10.0 (9.0, 11.0)        |
| <b>Population newly at risk of inadequate zinc intake (millions)</b> | 4.8 (4.1, 5.5)          | 1.1 (0.7, 1.5)                   | 5.7 (4.0, 7.4)                           | 3.0 (2.5, 3.5)             | 11.6 (10.6, 12.6)                          | 28.7 (21.7, 35.7)       | 10.2 (7.9, 12.5)        | 46.5 (31.4, 61.6)       | 13.9 (9.4, 18.4)                    | 7.1 (4.7, 9.5)          | 132.7 (115.0, 150.4)    |

**Supplemental Table S4. Increased risk of zinc deficiency in response to elevated [CO<sub>2</sub>] under three different models for the most affected countries**

| Country                               | % Zn def | Change % Zn def<br>(w/o rice) | Change % Zn def<br>(w/ rice) | % Zn def IOM | Change % Zn def<br>IOM (w/o rice) |
|---------------------------------------|----------|-------------------------------|------------------------------|--------------|-----------------------------------|
| Democratic Republic of the Congo      | 54.3     | 9.9 (1.2, 19.5)               | 9.7 (1.1, 19.2)              | 98.3         | 1.1 (0.2, 1.5)                    |
| Sao Tome and Principe                 | 31.7     | 7.5 (2.8, 13)                 | 7.2 (2.6, 12.5)              | 90.2         | 2.8 (1.2, 4.1)                    |
| Sri Lanka                             | 45.7     | 6.9 (2, 12.7)                 | 6.7 (1.9, 12.4)              | 97.5         | 3.3 (1.1, 5.1)                    |
| Zambia                                | 44.9     | 6.6 (0.7, 13.1)               | 6.5 (0.6, 12.9)              | 96.2         | 2.2 (0.3, 3.6)                    |
| Malawi                                | 40.6     | 6.2 (0.5, 12.3)               | 6.1 (0.4, 12.1)              | 94.6         | 1.6 (0.1, 2.5)                    |
| Burundi                               | 38.0     | 5.3 (0.9, 9.8)                | 5.3 (0.8, 9.7)               | 93.9         | 1 (0.2, 1.6)                      |
| Rwanda                                | 34.9     | 5.2 (3.2, 7.3)                | 4.8 (2.9, 6.7)               | 92.0         | 1 (0.6, 1.3)                      |
| Liberia                               | 35.2     | 5.2 (2, 8.7)                  | 4.9 (1.8, 8.3)               | 92.1         | 2.8 (1.2, 4.2)                    |
| Qatar                                 | 33.4     | 5.2 (1.2, 10.1)               | 5 (1.1, 9.7)                 | 90.0         | 4.2 (1.1, 7)                      |
| Zimbabwe                              | 48.4     | 5.2 (0.8, 9.9)                | 5.1 (0.8, 9.7)               | 97.4         | 2 (0.4, 3.2)                      |
| Chad                                  | 34.5     | 5.1 (2.8, 7.6)                | 4.6 (2.5, 6.8)               | 91.5         | 2.7 (1.6, 3.7)                    |
| United Republic of Tanzania           | 34.1     | 5.1 (1.3, 9.2)                | 4.9 (1.2, 9)                 | 91.4         | 2.8 (0.8, 4.4)                    |
| Lesotho                               | 38.3     | 4.9 (1.6, 8.8)                | 4.8 (1.5, 8.5)               | 94.3         | 2.5 (0.9, 3.9)                    |
| Bhutan                                | 31.7     | 4.3 (2.1, 6.8)                | 4.1 (2, 6.5)                 | 90.2         | 3.7 (2, 5.4)                      |
| Haiti                                 | 34.9     | 4.2 (1.5, 7.2)                | 4 (1.3, 6.9)                 | 92.6         | 2.5 (0.9, 3.8)                    |
| Comoros                               | 32.0     | 4 (3.3, 4.8)                  | 3.8 (3.2, 4.5)               | 90.2         | 2.5 (2.1, 3)                      |
| Cameroon                              | 33.8     | 4 (1.5, 6.7)                  | 3.8 (1.4, 6.4)               | 91.5         | 2.1 (0.9, 3.3)                    |
| Democratic People's Republic of Korea | 31.2     | 3.5 (1.5, 5.5)                | 3.3 (1.4, 5.3)               | 91.7         | 2.4 (1.1, 3.5)                    |
| India                                 | 31.2     | 3.5 (1.1, 6)                  | 3.4 (1.1, 5.9)               | 90.4         | 2.7 (0.9, 4.2)                    |
| Gambia                                | 34.9     | 3.4 (0.9, 5.9)                | 3.2 (0.9, 5.7)               | 91.9         | 2.6 (0.8, 4.3)                    |
| Côte d'Ivoire                         | 33.4     | 3.3 (1.8, 4.8)                | 3.2 (1.7, 4.8)               | 90.9         | 2.4 (1.3, 3.3)                    |
| Mozambique                            | 31.4     | 3.3 (0.9, 5.8)                | 3.3 (0.8, 5.7)               | 90.0         | 1.3 (0.4, 2.2)                    |
| Indonesia                             | 31.2     | 3.2 (2.6, 4)                  | 3.1 (2.5, 3.7)               | 91.1         | 3.4 (2.8, 4.1)                    |
| Burkina Faso                          | 39.4     | 3.1 (2.6, 3.6)                | 2.9 (2.5, 3.4)               | 94.2         | 3.4 (3, 4)                        |

**Supplemental Figure S1. The choice of model for estimating increased risk of zinc deficiency from elevated atmospheric [CO<sub>2</sub>] has little impact on how the most impacted countries are ranked.**

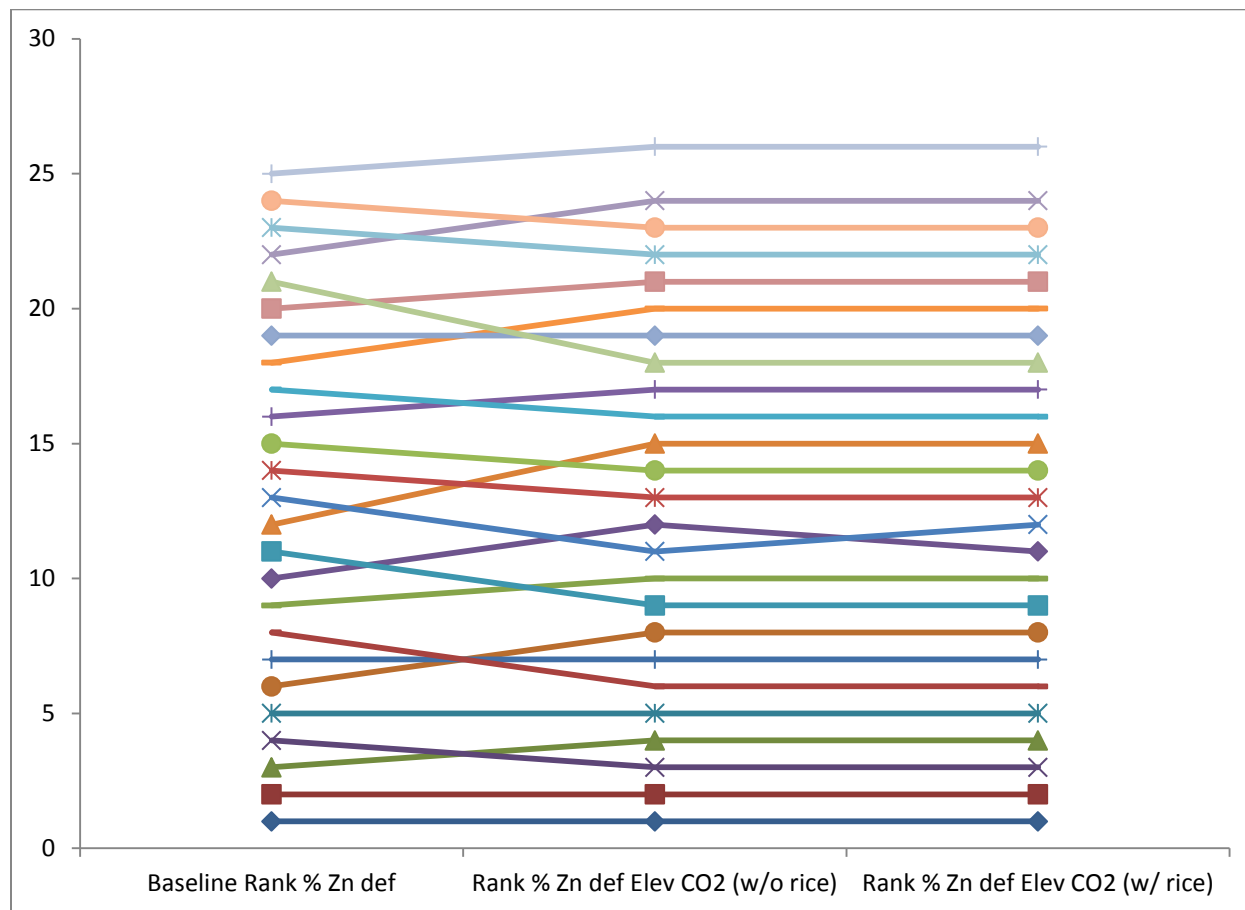

Supplement: NIHMS764150-supplement-supplement_1.pdf [file NIHMS764150-supplement-supplement_1.pdf]
